# Supplementary material for: How do organic gold compounds and organic halogen molecules interact? Comparison with hydrogen bonds
Source: Royal Society of Chemistry journal article supplement (doi:10.1039/c4ra13627f), 2015-01-01
Supplement: c4ra13627f1.pdf [file c4ra13627f1.pdf]

## Supporting information

### How do organic gold compounds and organic halogen molecules interact? Comparison with hydrogen bonds

MengGao, Qingzhong Li\*, Hai-Bei Li\*, Wenzuo Li, Jianbo Cheng

#### Figure list

**Fig. S1.** Gradient isosurfaces ( $s=0.1$  au) and plots of the reduced density gradient (RDG) versus the electron density multiplied by the sign of the second Hessian eigenvalue in GBs.

**Fig. S2.** Gradient isosurfaces ( $s=0.1$  au) and plots of the reduced density gradient (RDG) versus the electron density multiplied by the sign of the second Hessian eigenvalue in XBs.

**Fig. S3.** Electron density differences of GBs ( $\text{iso}=0.002$ ) in all systems. Red regions indicate increased electron density, while blue regions represent decreased electron density.

**Fig. S4.** Electron density differences of XBs ( $\text{iso}=0.0002$ ) in all systems. Red regions indicate increased electron density, while blue regions represent decreased electron density.

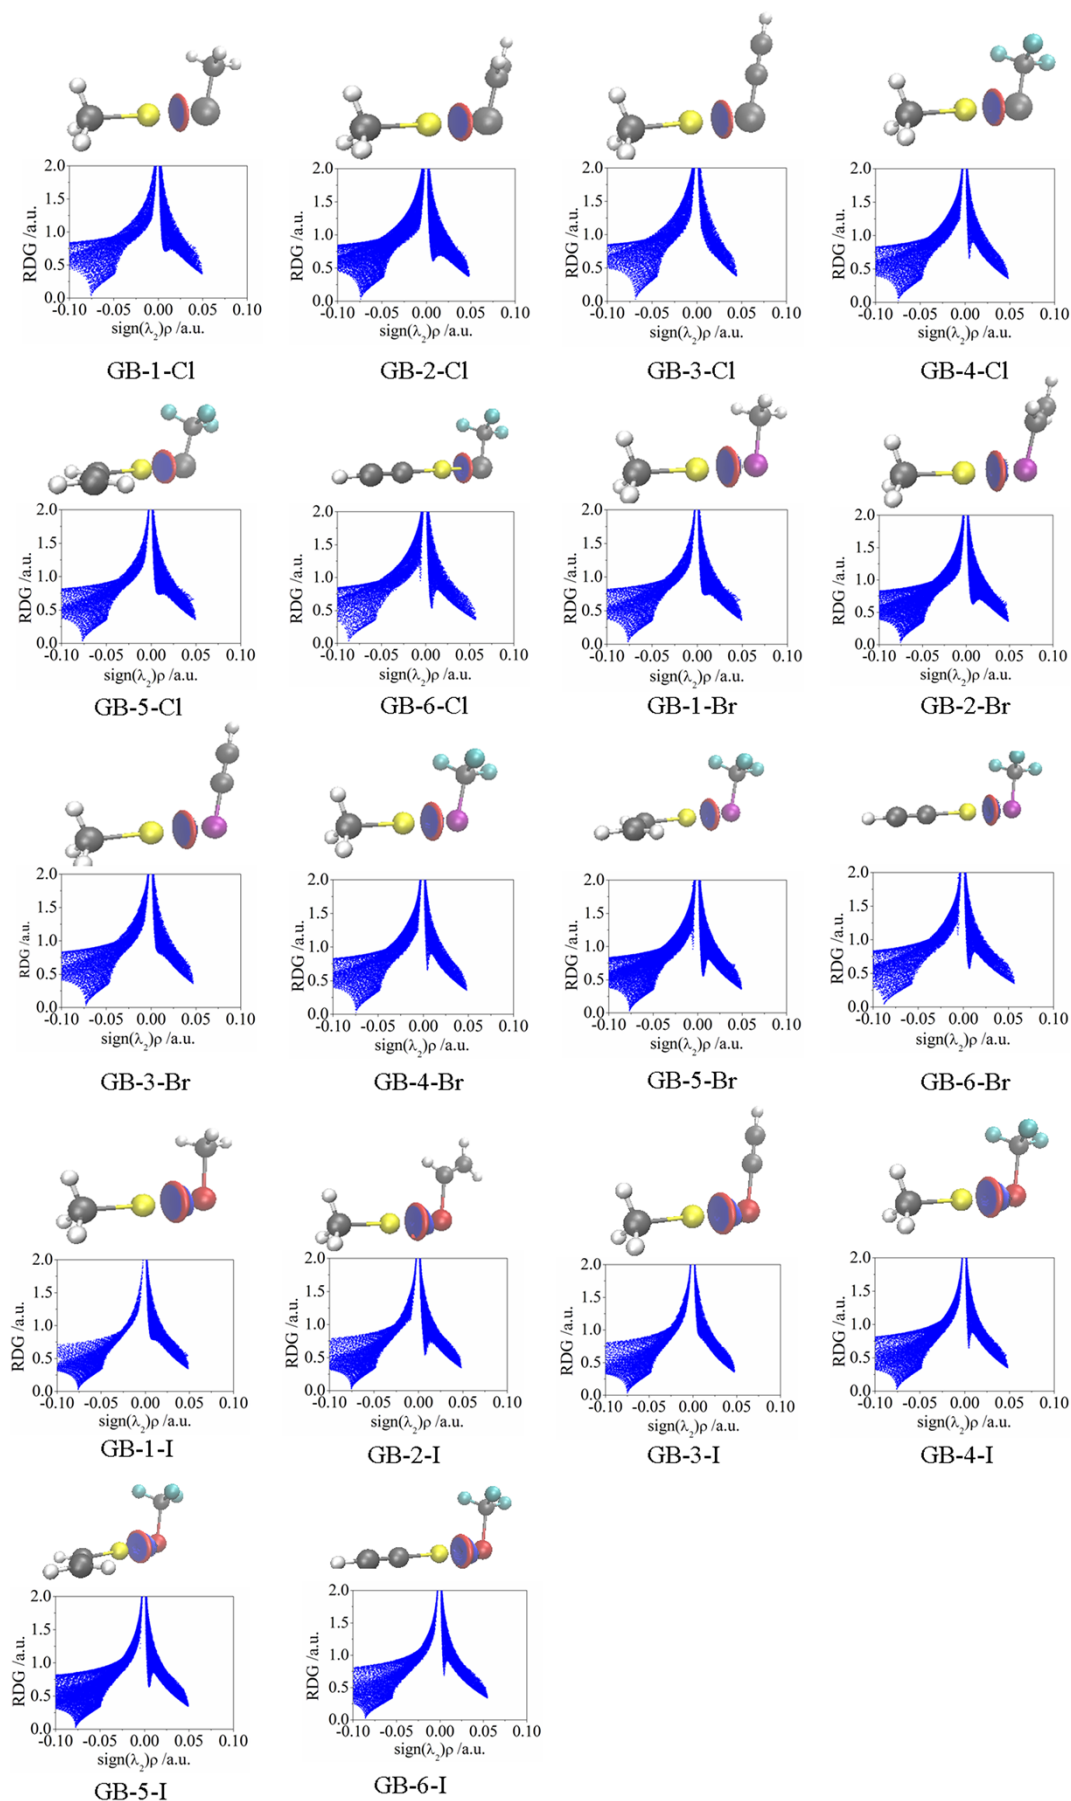

**Fig. S1.** Gradient isosurfaces ( $s=0.1$  au) and plots of the reduced density gradient (RDG) versus the electron density multiplied by the sign of the second Hessian eigenvalue in GBs.

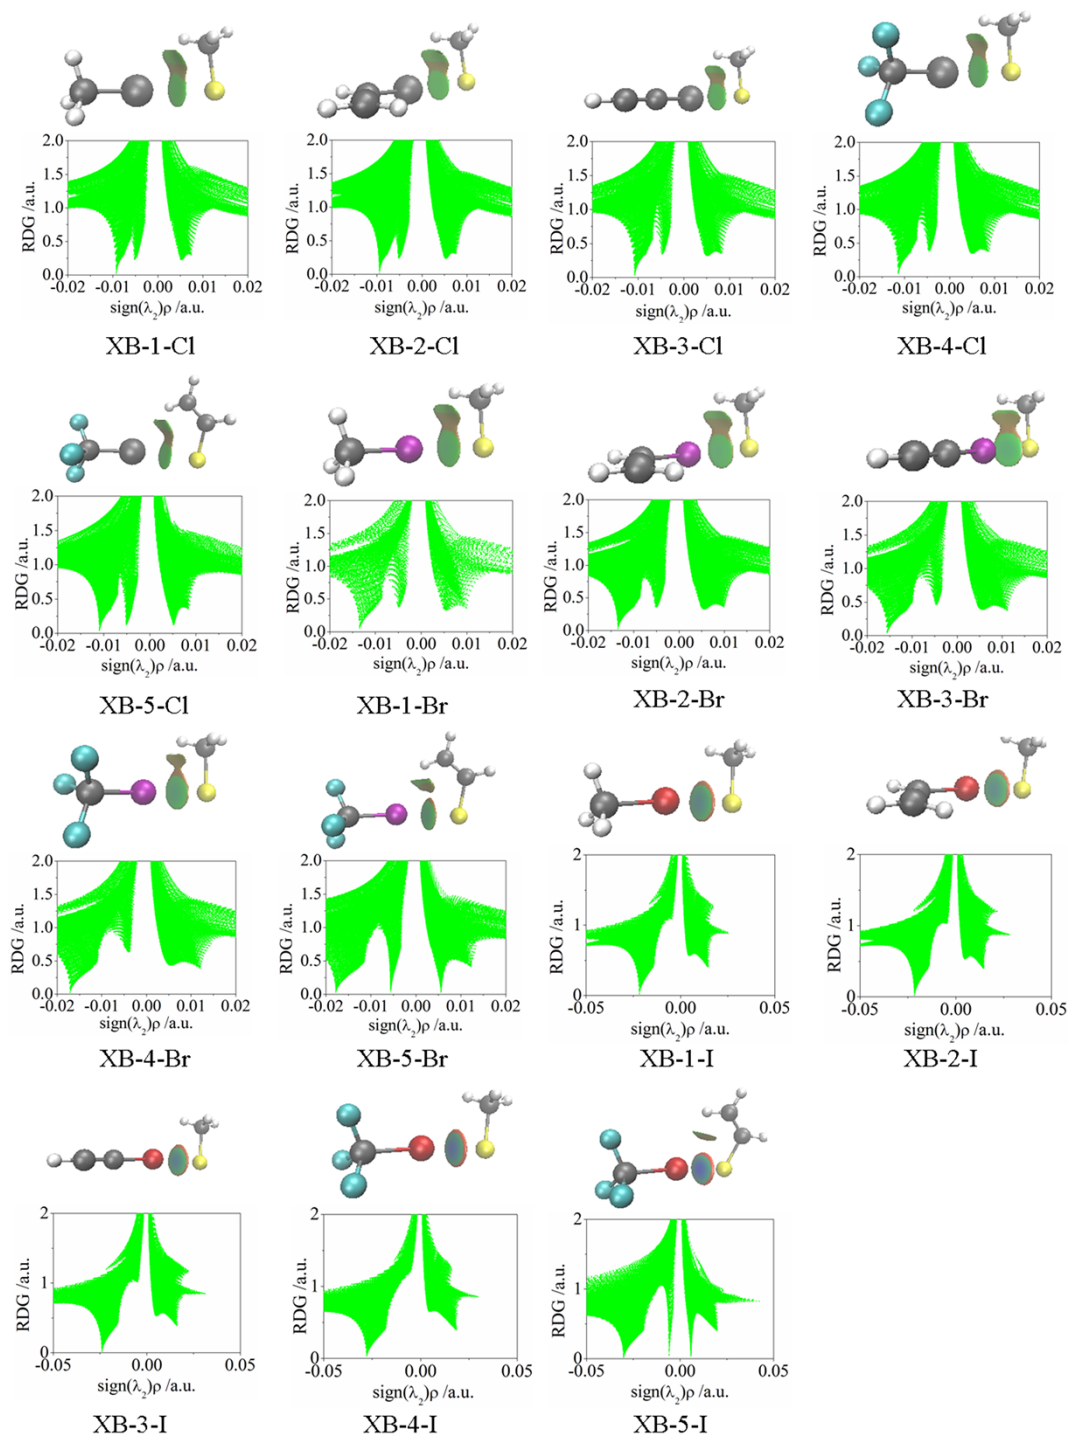

**Fig. S2.** Gradient isosurfaces ( $s=0.1$  au) and plots of the reduced density gradient (RDG) versus the electron density multiplied by the sign of the second Hessian eigenvalue in XB-1-Br.

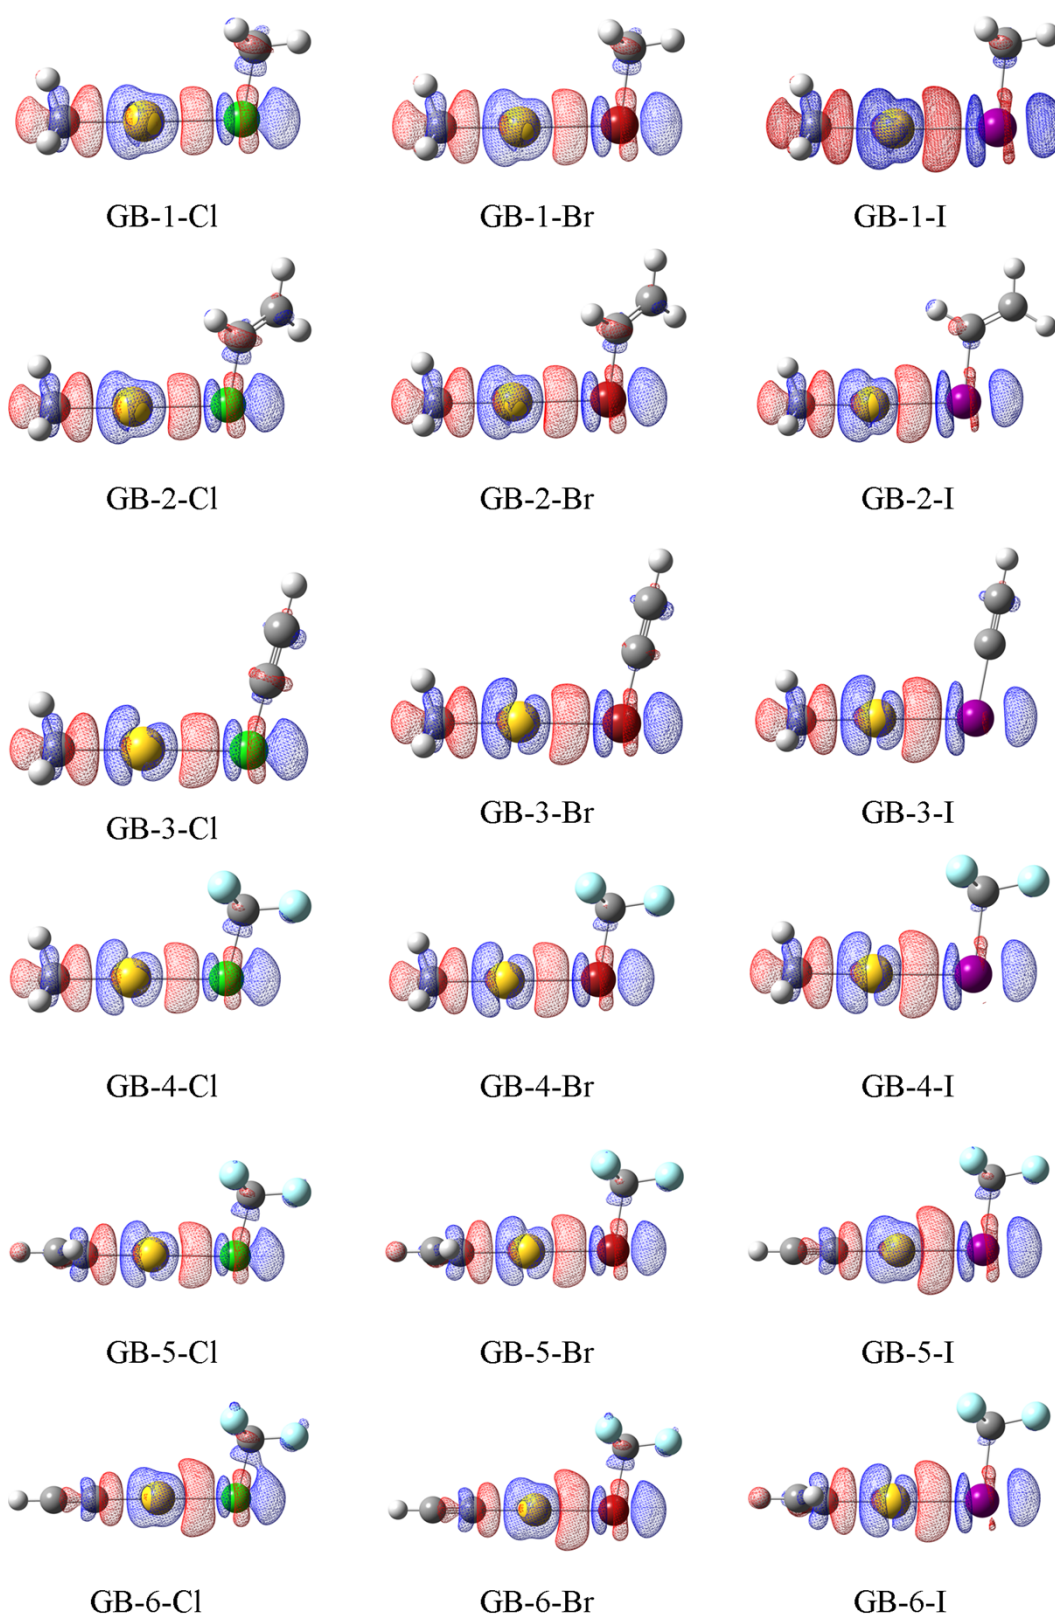

**Fig. S3.** Electron density differences of GBs (iso=0.002) in all systems. Red regions indicate increased electron density, while blue regions represent decreased electron density.

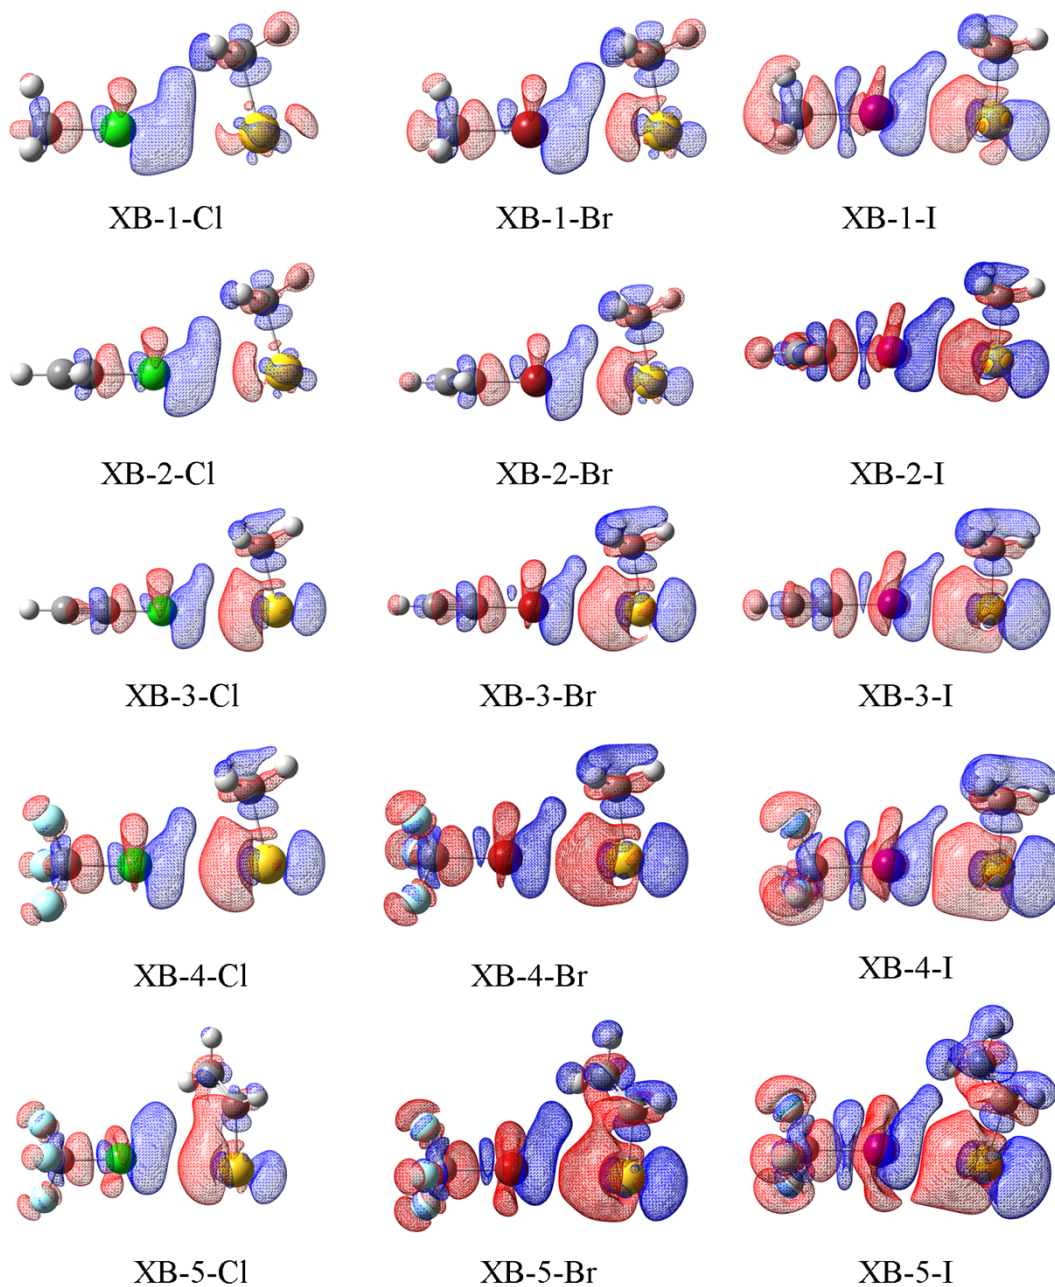

**Fig. S4.** Electron density differences of XBs (iso=0.0002) in all systems. Red regions indicate increased electron density, while blue regions represent decreased electron density.
